# Supplementary material for: Inhibition of the glucocorticoid receptor results in an enhanced miR-99a/100-mediated radiation response in stem-like cells from human prostate cancers
Source: PubMed Central journal article supplement (PMC5239528; doi:10.18632/oncotarget.10207), 2016-06-21
Supplement: oncotarget-07-51965-s001.pdf [file oncotarget-07-51965-s001.pdf]

## Inhibition of the glucocorticoid receptor results in an enhanced miR-99a/100-mediated radiation response in stem-like cells from human prostate cancers

### SUPPLEMENTARY FIGURES AND TABLE

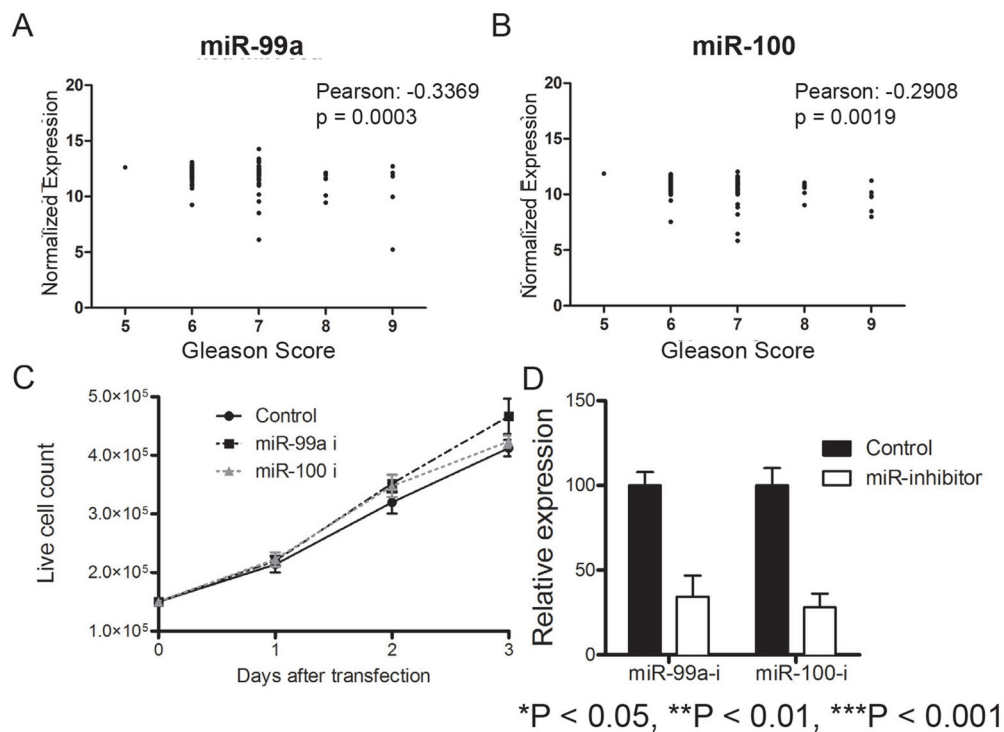

**Supplementary Figure S1: A+B.** Pearson correlation analysis of miR-99a (A) and miR-100 (B) expression with Gleason Score in the GSE21036 cohort. **C.** Proliferation analysis of malignant CB cells measured by live cell count after miR-99a and miR-100 inhibition (n=3 PCa). **D.** qRT-PCR analysis of miR-99a and miR-100 expression in CB cells 72 hours after miR-99a and miR-100 inhibitor transfection (n=3 PCa). Data are expressed as mean  $\pm$  s.d. \*P < 0.05, \*\*P < 0.01, \*\*\*P < 0.001 (Student's ttest).

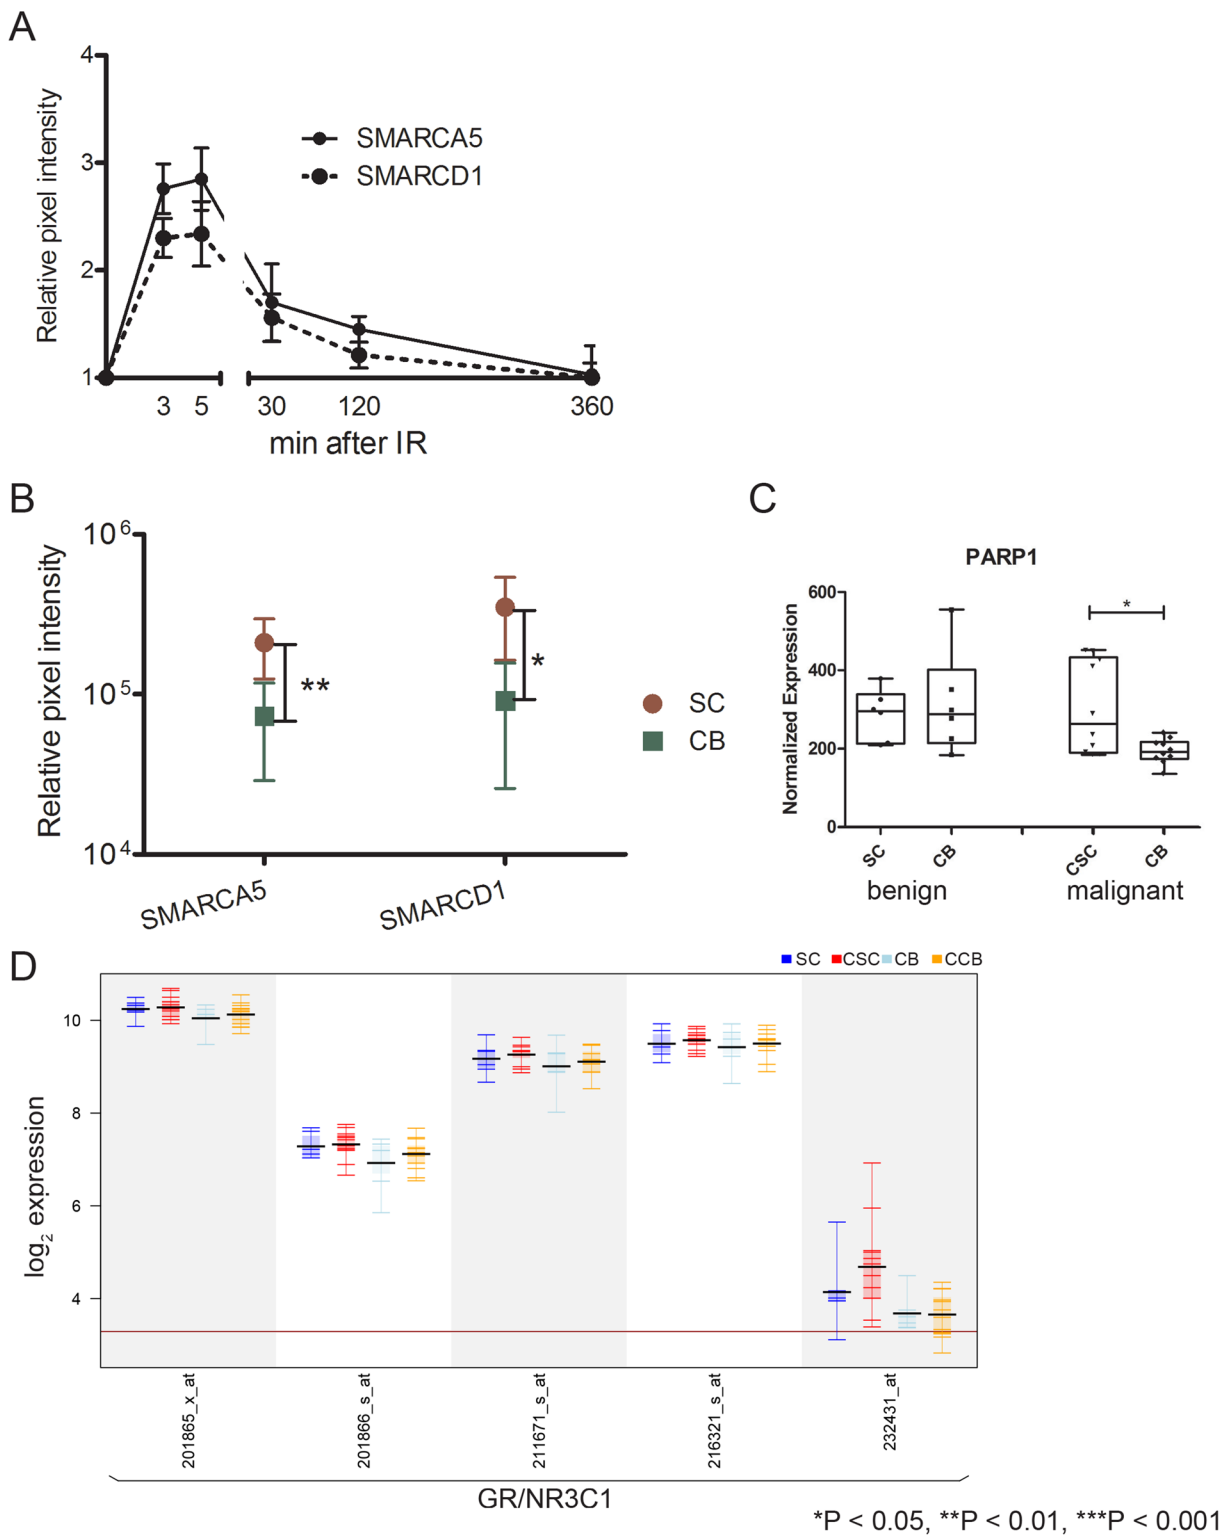

**Supplementary Figure S2: A.** Rapid recruitment kinetics of SMARCA5 and SMARCD1 to the cell nucleus in SC post 5Gy irradiation. **B.** Quantification of nuclear SMARCA5 and SMARCD1 in SC and CB. Immunofluorescence staining was performed 5 minutes after exposure to 5-Gy radiation (n=3 BPH and PCa, each sample in triplicate). >250 cells/sample were counted. **C.** Normalized microarray expression of PARP1 in SC (s) and CB (c) cells from Birnie et al., 2008 dataset. **D.** Log<sub>2</sub> microarray expression of glucocorticoid receptor (GR/NR3C1) probes in benign SC malignant SC (CSC), benign CB, and malignant CB (CBC) from Birnie et al., 2008 dataset. Data are expressed as mean ± s.d. \*P < 0.05, \*\*P < 0.01, \*\*\*P < 0.001 (Student's ttest).

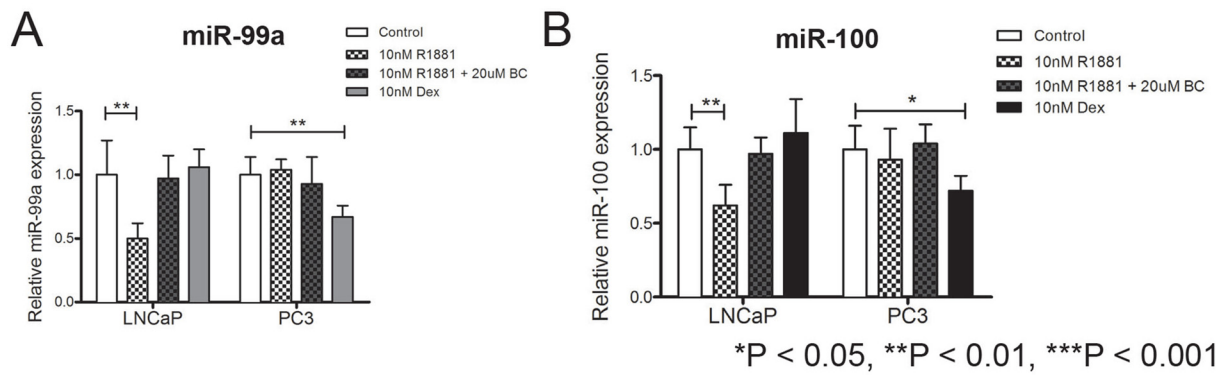

**Supplementary Figure S3: A+B.** qRT-PCR analysis of miR-99a (A) and miR-100 (B) expression in LNCaP and PC3 cells 72 hours after treatment with R1881, Bicalutamide or Dexamethasone. (n=3). Data are expressed as mean  $\pm$  s.d. \*P < 0.05, \*\*P < 0.01, \*\*\*P < 0.001 (Student's ttest).

**Supplementary Table S1: Antibody dilutions used for immunofluorescence (IF) and western blot (WB)**

| Name                                                      | Company                                             | Western Blot      | Immunofluorescence |
|-----------------------------------------------------------|-----------------------------------------------------|-------------------|--------------------|
|                                                           |                                                     | Working Dillution |                    |
| Anti-gamma H2A.X (phospho S139) antibody (ab111174)       | Abcam, Cambridge, UK                                |                   | 1:200              |
| Anti-SMARCA5 antibody (ab3749)                            | Abcam, Cambridge, UK                                | 1:500             | 1:500              |
| Anti-SMARCD1 antibody (611728)                            | BD Biosciences, San Jose, USA                       | 1:1000            | 1:100              |
| Phospho-p53 (Ser20) Antibody (#9287)                      | Cell Signaling Technology, Danvers, USA             |                   | 1:100              |
| Cleaved Caspase-3 (Asp175) Antibody (#9661)               | Cell Signaling Technology, Danvers, USA             |                   | 1:400              |
| Cleaved PARP (Asp214) Antibody (Human Specific) (#9541)   | Cell Signaling Technology, Danvers, USA             |                   | 1:100              |
| CDH1/E-Cadherin Clone NCH-38 (M3612)                      | Dako UK Ltd, Cambridge, UK                          | 1:1000            |                    |
| GAPDH Antibody Mouse monoclonal Clone: 1E6D9 (60004-1-Ig) | Proteintech Europe, Manchester, UK                  | 1:50000           |                    |
| BRCA1 Antibody (C-20) (sc-642)                            | Santa Cruz Biotechnology, Inc., Heidelberg, Germany | 1:500             |                    |
| Vimentin Antibody (V9) (sc-6260)                          | Santa Cruz Biotechnology, Inc., Heidelberg, Germany | 1:500             |                    |
| goat anti-mouse AlexaFluor-488                            | Life Technologies Ltd, Paisley, UK                  |                   | 1:500              |
| goat anti-rabbit AlexaFluor-568                           | Life Technologies Ltd, Paisley, UK                  |                   | 1:500              |
